# Supplementary material
Source: publisher site journal article supplement (https://www.dovepress.com/article/169019)
Supplement: Supplementary file 1 [file get_supplementary_file.php%3Ff%3D169019.pdf]

## Supplementary materials

**Table S1** Univariable analysis of breast cancer-specific survival (BCSS) and overall survival (OS) in total patients.

| Variables                | BCSS   |                  |         | OS     |                  |         |
|--------------------------|--------|------------------|---------|--------|------------------|---------|
|                          | n      | HR (95% CI)      | P-value | n      | HR (95% CI)      | P-value |
| <b>Group</b>             |        |                  | 0.590   |        |                  | 0.175   |
| OBC                      | 51     | 0.93 (0.70-1.22) | 0.590   | 68     | 0.85 (0.67-1.08) | 0.175   |
| non-OBC                  | 12,847 | Reference        | —       | 18,644 | Reference        | —       |
| <b>Year of diagnosis</b> |        |                  | <0.001  |        |                  | <0.001  |
| 2004-2009                | 10,260 | Reference        | —       | 15,020 | Reference        | —       |
| 2010-2014                | 2638   | 0.90 (0.86-0.94) | <0.001  | 3,692  | 0.89 (0.86-0.93) | <0.001  |
| <b>Age at diagnosis</b>  |        |                  | <0.001  |        |                  | <0.001  |
| 18-49                    | 3,877  | Reference        | —       | 4,340  | Reference        | —       |
| ≥50                      | 9,021  | 1.20 (1.16-1.25) | <0.001  | 14,372 | 1.72 (1.66-1.77) | <0.001  |
| <b>Race</b>              |        |                  | <0.001  |        |                  | <0.001  |
| White                    | 9,730  | Reference        | —       | 14,356 | Reference        | —       |
| Black                    | 2,294  | 1.67 (1.59-1.74) | <0.001  | 3,153  | 1.56 (1.50-1.62) | <0.001  |
| Others <sup>a</sup>      | 848    | 0.82 (0.76-0.87) | <0.001  | 1,167  | 0.76 (0.72-0.81) | <0.001  |
| Unknown                  | 26     | 0.46 (0.31-0.68) | <0.001  | 36     | 0.43 (0.31-0.60) | <0.001  |
| <b>Marital status</b>    |        |                  | <0.001  |        |                  | <0.001  |
| Married                  | 6,592  | Reference        | —       | 8,663  | Reference        | —       |
| Not married <sup>b</sup> | 5,875  | 1.45 (1.40-1.50) | <0.001  | 9,407  | 1.77 (1.72-1.82) | <0.001  |
| Unknown                  | 431    | 1.17 (1.06-1.29) | 0.001   | 642    | 1.34 (1.23-1.45) | <0.001  |
| <b>Laterality</b>        |        |                  | 0.033   |        |                  | 0.065   |
| Left                     | 6,634  | Reference        | —       | 9,581  | Reference        | —       |
| Right                    | 6,263  | 0.96 (0.93-1.00) | 0.034   | 9,125  | 0.97 (0.95-1.00) | 0.052   |

|                            |        |                  |        |        |                  |        |
|----------------------------|--------|------------------|--------|--------|------------------|--------|
| Only one side, NOS         | 1      | 0.78 (0.11-5.12) | 0.800  | 6      | 3.30 (1.48-7.34) | 0.003  |
| <b>Grade</b>               |        |                  | <0.001 |        |                  | <0.001 |
| 1 and 2                    | 4,211  | Reference        | —      | 7,482  | Reference        | —      |
| 3 and UD                   | 8,220  | 2.65 (2.56-2.75) | <0.001 | 10,529 | 1.91 (1.86-1.97) | <0.001 |
| Unknown                    | 467    | 1.65 (1.50-1.81) | <0.001 | 701    | 1.39 (1.28-1.50) | <0.001 |
| <b>ER status</b>           |        |                  | <0.001 |        |                  | <0.001 |
| Positive                   | 7,308  | Reference        | —      | 11,691 | Reference        | —      |
| Negative                   | 5,057  | 2.92 (2.82-3.03) | <0.001 | 6,181  | 2.23 (2.16-2.30) | <0.001 |
| Others <sup>c</sup>        | 533    | 1.66 (1.52-1.81) | <0.001 | 840    | 1.59 (1.49-1.71) | <0.001 |
| <b>PR status</b>           |        |                  | <0.001 |        |                  | <0.001 |
| Positive                   | 5,530  | Reference        | —      | 9,086  | Reference        | —      |
| Negative                   | 6,708  | 2.79 (2.69-2.89) | <0.001 | 8,582  | 2.17 (2.11-2.24) | <0.001 |
| Others <sup>c</sup>        | 660    | 1.75 (1.61-1.90) | <0.001 | 1,044  | 1.65 (1.55-1.76) | <0.001 |
| <b>HER2 status</b>         |        |                  | <0.001 |        |                  | <0.001 |
| Positive                   | 395    | Reference        | —      | 523    | Reference        | —      |
| Negative                   | 2,119  | 1.15 (1.03-1.28) | 0.013  | 2,962  | 1.21 (1.10-1.33) | <0.001 |
| Others <sup>d</sup>        | 10,384 | 1.25 (1.12-1.38) | <0.001 | 15,227 | 1.33 (1.21-1.45) | <0.001 |
| <b>Breast surgery type</b> |        |                  | <0.001 |        |                  | <0.001 |
| Mastectomy                 | 8,803  | Reference        | —      | 5,892  | Reference        | —      |
| BCS                        | 3,894  | 0.56 (0.54-0.59) | <0.001 | 12,563 | 0.59 (0.58-0.61) | <0.001 |
| No surgery                 | 201    | 1.67 (1.45-1.92) | <0.001 | 257    | 1.49 (1.32-1.69) | <0.001 |
| <b>Radiotherapy</b>        |        |                  | <0.001 |        |                  | <0.001 |
| Yes                        | 6,486  | Reference        | —      | 8,604  | Reference        | —      |
| No                         | 6,412  | 1.19 (1.15-1.24) | <0.001 | 10,108 | 1.42 (1.38-1.46) | <0.001 |
| <b>No. of positive LNs</b> |        |                  | <0.001 |        |                  | <0.001 |
| 1-3                        | 6,254  | Reference        | —      | 10,244 | Reference        | —      |
| 4-9                        | 3,802  | 2.27 (2.18-2.36) | <0.001 | 5,054  | 1.84 (1.78-1.90) | <0.001 |

|         |       |                  |        |       |                  |        |
|---------|-------|------------------|--------|-------|------------------|--------|
| ≥10     | 2,808 | 4.34 (4.15-4.54) | <0.001 | 3,376 | 3.21 (3.09-3.34) | <0.001 |
| Unknown | 34    | 1.32 (0.94-1.85) | 0.227  | 38    | 0.91 (0.66-1.25) | 0.560  |

**Note:** <sup>a</sup>Including American Indian/Alaskan native and Asian/Pacific Islander.

<sup>b</sup>Including divorced, separated, single (never married), and widowed.

<sup>c</sup>Including borderline and unknown.

<sup>d</sup>Including borderline and unknown and not 2010+breast.

**Abbreviations:** AJCC, American Joint Committee on Cancer; BCS, breast-conserving surgery; CI, confidence interval; ER, oestrogen receptor; HER2, human epidermal growth factor receptor 2; HR, hazard ratio; LNs, lymph nodes; n, the number of deaths; OBC, occult breast cancer; PR, progesterone receptor; UD, undifferentiated.

**Table S2** Clinicopathological characteristics of patients with OBC and non-OBC

in a 1:1 matched group.

| <b>Variables</b>           | <b>OBC,<br/>n=397<br/>(%)</b> | <b>non-OBC,<br/>n=397<br/>(%)</b> | <b>P-Value <sup>a</sup></b> |
|----------------------------|-------------------------------|-----------------------------------|-----------------------------|
| <b>Year of diagnosis</b>   |                               |                                   | 0.943                       |
| 2004-2009                  | 216 (54.41)                   | 215 (54.16)                       |                             |
| 2010-2014                  | 181 (45.59)                   | 182 (45.84)                       |                             |
| <b>Age at diagnosis</b>    |                               |                                   | 0.636                       |
| 18-49                      | 109 (27.46)                   | 115 (28.97)                       |                             |
| ≥50                        | 288 (72.54)                   | 282 (71.03)                       |                             |
| <b>Race</b>                |                               |                                   | 1.000                       |
| White                      | 318 (80.10)                   | 316 (79.60)                       |                             |
| Black                      | 47 (11.84)                    | 53 (13.35)                        |                             |
| Others <sup>b</sup>        | 31 (7.81)                     | 25 (6.30)                         |                             |
| Unknown                    | 1 (0.25)                      | 3 (0.75)                          |                             |
| <b>Marital status</b>      |                               |                                   | 0.269                       |
| Married                    | 230 (57.93)                   | 221 (55.67)                       |                             |
| Not married <sup>c</sup>   | 155 (39.05)                   | 155 (39.04)                       |                             |
| Unknown                    | 12 (3.02)                     | 21 (5.29)                         |                             |
| <b>Laterality</b>          |                               |                                   | 0.778                       |
| Left                       | 203 (51.13)                   | 206 (51.89)                       |                             |
| Right                      | 193 (48.62)                   | 191 (48.11)                       |                             |
| Only one side, NOS         | 1 (0.25)                      | 0 (0.00)                          |                             |
| <b>Grade</b>               |                               |                                   | 0.183                       |
| 1 and 2                    | 29 (7.31)                     | 24 (6.05)                         |                             |
| 3 and UD                   | 113 (28.46)                   | 100 (25.19)                       |                             |
| Unknown                    | 255 (64.23)                   | 273 (68.76)                       |                             |
| <b>AJCC stage</b>          |                               |                                   | 0.130                       |
| II                         | 244 (61.46)                   | 223 (56.17)                       |                             |
| III                        | 153 (38.54)                   | 174 (43.83)                       |                             |
| <b>AJCC N stage</b>        |                               |                                   | 0.386                       |
| N1                         | 244 (61.46)                   | 254 (63.98)                       |                             |
| N2                         | 78 (19.65)                    | 77 (19.40)                        |                             |
| N3                         | 75 (18.89)                    | 66 (16.62)                        |                             |
| <b>No. of positive LNs</b> |                               |                                   | 0.087                       |
| 1-3                        | 248 (62.47)                   | 264 (66.50)                       |                             |
| 4-9                        | 75 (18.89)                    | 77 (19.40)                        |                             |
| ≥10                        | 60 (15.11)                    | 48 (12.09)                        |                             |

|                            |             |             |       |
|----------------------------|-------------|-------------|-------|
| Unknown                    | 14 (3.53)   | 8 (2.01)    |       |
| <b>ER status</b>           |             |             | 0.151 |
| Positive                   | 229 (57.68) | 217 (54.66) |       |
| Negative                   | 143 (36.02) | 141 (35.52) |       |
| Others <sup>d</sup>        | 25 (6.30)   | 39 (9.82)   |       |
| <b>PR status</b>           |             |             | 0.078 |
| Positive                   | 162 (40.81) | 144 (36.27) |       |
| Negative                   | 206 (51.89) | 211 (53.15) |       |
| Others <sup>d</sup>        | 29 (7.30)   | 42 (10.58)  |       |
| <b>HER2 status</b>         |             |             | 0.722 |
| Positive                   | 46 (11.59)  | 48 (12.09)  |       |
| Negative                   | 115 (28.97) | 118 (29.72) |       |
| Others <sup>e</sup>        | 236 (59.44) | 231 (58.19) |       |
| <b>Breast surgery type</b> |             |             | 0.242 |
| BCS                        | 66 (16.62)  | 66 (16.62)  |       |
| Mastectomy                 | 179 (45.09) | 202 (50.89) |       |
| No surgery                 | 152 (38.29) | 129 (32.49) |       |
| <b>Radiotherapy</b>        |             |             | 0.523 |
| Yes                        | 195 (49.12) | 186 (46.85) |       |
| No                         | 202 (50.88) | 211 (53.15) |       |

**Note:** <sup>a</sup>*P*-value was assessed using a conditional logistic regression.

<sup>b</sup>Including American Indian/Alaskan native and Asian/Pacific Islander.

<sup>c</sup>Including divorced, separated, single (never married), and widowed.

<sup>d</sup>Including borderline and unknown.

<sup>e</sup>Including borderline and unknown and not 2010+breast.

**Abbreviations:** AJCC, American Joint Committee on Cancer; BCS, breast-conserving surgery; ER, oestrogen receptor; HER2, human epidermal growth factor receptor 2; LNs, lymph nodes; NOS, not otherwise specified; OBC, occult breast cancer; PR, progesterone receptor; UD, undifferentiated.

**Table S3** Univariable and multivariable analysis of breast cancer-specific survival (BCSS) and overall survival (OS) in a 1:1 matched group.

| Variables                       | Univariable       |         |                  |         | Multivariable    |         |                  |         |
|---------------------------------|-------------------|---------|------------------|---------|------------------|---------|------------------|---------|
|                                 | BCSS              |         | OS               |         | BCSS             |         | OS               |         |
|                                 | HR (95% CI)       | P-value | HR (95% CI)      | P-value | HR (95% CI)      | P-value | HR (95% CI)      | P-value |
| <b>Group</b>                    |                   |         |                  |         |                  |         |                  |         |
| OBC                             | 0.93 (0.70-1.22)  | 0.590   | 0.85 (0.67-1.08) | 0.175   | 0.40 (0.27-0.50) | <0.001  | 0.41 (0.31-0.52) | <0.001  |
| non-OBC                         | Reference         | —       | Reference        | —       | Reference        | —       | Reference        | —       |
| <b>Year of diagnosis</b>        |                   |         |                  |         |                  |         |                  |         |
| 2004-2009                       | Reference         | —       | Reference        | —       | Reference        | —       | Reference        | —       |
| 2010-2014                       | 0.90 (0.86-0.94)  | <0.001  | 0.89 (0.86-0.93) | <0.001  | 0.93 (0.77-1.11) | 0.402   | 1.02 (0.88-1.17) | 0.831   |
| <b>Age at diagnosis (years)</b> |                   |         |                  |         |                  |         |                  |         |
| 18-49                           | Reference         | —       | Reference        | —       | Reference        | —       | Reference        | —       |
| ≥50                             | 1.20 (1.16-1.25)  | <0.001  | 1.72 (1.66-1.77) | <0.001  | 1.25 (1.20-1.30) | <0.001  | 1.72 (1.66-1.78) | <0.001  |
| <b>Race</b>                     |                   |         |                  |         |                  |         |                  |         |
| White                           | Reference         | —       | Reference        | —       | Reference        | —       | Reference        | —       |
| Black                           | 1.67 (1.59-1.74)  | <0.001  | 1.56 (1.50-1.62) | <0.001  | 1.31 (1.25-1.37) | <0.001  | 1.25 (1.20-1.30) | <0.001  |
| Others <sup>a</sup>             | 0.82 (0.76-0.87)  | <0.001  | 0.76 (0.72-0.81) | <0.001  | 0.79 (0.73-0.84) | <0.001  | 0.77 (0.72-0.82) | <0.001  |
| Unknown                         | 0.46 (0.31-0.68)  | <0.001  | 0.43 (0.31-0.60) | <0.001  | 0.49 (0.33-0.72) | <0.001  | 0.44 (0.32-0.61) | <0.001  |
| <b>Marital status</b>           |                   |         |                  |         |                  |         |                  |         |
| Married                         | Reference         | —       | Reference        | —       | Reference        | —       | Reference        | —       |
| Not married <sup>b</sup>        | 1.45 (1.440-1.50) | <0.001  | 1.77 (1.72-1.82) | <0.001  | 1.32 (1.27-1.36) | <0.001  | 1.58 (1.54-1.63) | <0.001  |
| Unknown                         | 1.17 (1.06-1.29)  | 0.001   | 1.34 (1.23-1.45) | <0.001  | 1.13 (1.03-1.25) | 0.009   | 1.26 (1.16-1.36) | <0.001  |
| <b>Laterality</b>               |                   |         |                  |         |                  |         |                  |         |
| Left                            | Reference         | —       | Reference        | —       |                  |         |                  |         |

|                            |                   |        |                  |        |                  |        |                  |        |
|----------------------------|-------------------|--------|------------------|--------|------------------|--------|------------------|--------|
| Right                      | 0.96 (0.93-1.00)  | 0.034  | 0.97 (0.94-1.00) | 0.052  |                  |        |                  |        |
| Only one side, NOS         | 0.78 (0.11-5.51)  | 0.800  | 3.30 (1.48-7.34) | 0.003  |                  |        |                  |        |
| <b>Grade</b>               |                   |        |                  |        |                  |        |                  |        |
| 1 and 2                    | Reference         | —      | Reference        | —      | Reference        | —      | Reference        | —      |
| 3 and UD                   | 2.66 (2.55-2.75)  | <0.001 | 1.91 (1.86-1.97) | <0.001 | 1.78 (1.71-1.85) | —      | 1.45 (1.40-1.50) | —      |
| Unknown                    | 1.65 (1.50-1.82)  | <0.001 | 1.39 (1.28-1.50) | <0.001 | 1.32 (1.03-1.25) | —      | 1.18 (1.09-1.27) | —      |
| <b>AJCC stage</b>          |                   |        |                  |        |                  |        |                  |        |
| II                         | Reference         | —      | Reference        | —      |                  |        |                  |        |
| III                        | 2.95 (2.84-3.05)  | <0.001 | 2.25 (2.19-2.32) | <0.001 |                  |        |                  |        |
| <b>ER status</b>           |                   |        |                  |        |                  |        |                  |        |
| Positive                   | Reference         | —      | Reference        | —      | Reference        | —      | Reference        | —      |
| Negative                   | 2.92 (2.82-3.02)  | <0.001 | 2.23 (2.16-2.30) | <0.001 | 1.52 (1.44-1.60) | <0.001 | 1.40 (1.34-1.46) | <0.001 |
| Others <sup>c</sup>        | 1.66 (1.52-1.81)  | <0.001 | 1.59 (1.49-1.71) | <0.001 | 1.25 (1.06-1.47) | 0.009  | 1.23 (1.07-1.40) | 0.003  |
| <b>PR status</b>           |                   |        |                  |        |                  |        |                  |        |
| Positive                   | Reference         | —      | Reference        | —      | Reference        | —      | Reference        | —      |
| Negative                   | 2.79 (2.69-2.89)  | <0.001 | 2.17 (2.11-2.23) | <0.001 | 1.64 (1.56-1.72) | <0.001 | 1.44 (1.38-1.50) | <0.001 |
| Others <sup>c</sup>        | 1.75 (1.61-1.90)  | <0.001 | 1.65 (1.55-1.76) | <0.001 | 1.29 (1.11-1.51) | <0.001 | 1.23 (1.07-1.40) | 0.002  |
| <b>HER2 status</b>         |                   |        |                  |        |                  |        |                  |        |
| Positive                   | Reference         | —      | Reference        | —      | Reference        | —      | Reference        | —      |
| Negative                   | 1.15 (1.03--1.28) | 0.013  | 1.21 (1.10-1.33) | <0.001 | 1.76 (1.33-1.44) | <0.001 | 1.63 (1.49-1.79) | <0.001 |
| Others <sup>d</sup>        | 1.25 (1.12-1.38)  | <0.001 | 1.33 (1.21-1.45) | <0.001 | 1.48 (1.21-1.82) | <0.001 | 1.60 (1.36-1.88) | <0.001 |
| <b>Breast surgery type</b> |                   |        |                  |        |                  |        |                  |        |
| Mastectomy                 | Reference         | —      | Reference        | —      | Reference        | —      | Reference        | —      |
| BCS                        | 1.77 (1.71-1.84)  | <0.001 | 1.68 (1.63-1.73) | <0.001 | 1.39 (1.33-1.44) | <0.001 | 1.35 (1.31-1.39) | <0.001 |
| No surgery                 | 2.96 (2.57-3.41)  | <0.001 | 2.51 (2.21-2.84) | <0.001 | 3.00 (2.58-2.49) | <0.001 | 2.43 (2.13-2.78) | <0.001 |
| <b>Radiotherapy</b>        |                   |        |                  |        |                  |        |                  |        |
| Yes                        | Reference         | —      | Reference        | —      | Reference        | —      | Reference        | —      |

|                            |                  |        |                  |        |                  |        |                  |        |
|----------------------------|------------------|--------|------------------|--------|------------------|--------|------------------|--------|
| No                         | 1.19 (1.15-1.24) | <0.001 | 1.42 (1.38-1.46) | <0.001 | 1.23 (1.19-1.27) | <0.001 | 1.39 (1.35-1.43) | <0.001 |
| <b>No. of examined LNs</b> |                  |        |                  |        |                  |        |                  |        |
| 1-3                        | Reference        | —      | Reference        | —      |                  |        |                  |        |
| 4-9                        | 1.26 (1.18-1.36) | <0.001 | 1.10 (1.04-1.16) | <0.001 |                  |        |                  |        |
| ≥10                        | 1.47 (1.38-1.57) | <0.001 | 1.15 (1.10-1.20) | <0.001 |                  |        |                  |        |
| <b>No. of positive LNs</b> |                  |        |                  |        |                  |        |                  |        |
| 1-3                        | Reference        | —      | Reference        | —      | Reference        | —      | Reference        | —      |
| 4-9                        | 2.27 (2.18-2.36) | <0.001 | 1.84 (1.78-1.90) | <0.001 | 2.13 (2.04-2.22) | <0.001 | 1.79 (1.73-1.86) | <0.001 |
| ≥10                        | 4.34 (4.15-4.54) | <0.001 | 3.21 (3.09-3.34) | <0.001 | 3.79 (3.62-3.97) | <0.001 | 2.92 (2.81-3.04) | <0.001 |
| Unknown                    | 1.31 (0.94-1.85) | 0.109  | 0.91 (0.66-1.25) | 0.560  | 0.98 (0.69-1.36) | 0.843  | 0.80 (0.58-1.11) | 0.179  |

**Note:** <sup>a</sup>Including American Indian/Alaskan native and Asian/Pacific Islander.

<sup>b</sup>Including divorced, separated, single (never married), and widowed.

<sup>c</sup>Including borderline and unknown.

<sup>d</sup>Including borderline and unknown and not 2010+breast.

**Abbreviations:** AJCC, American Joint Committee on Cancer; BCS, breast-conserving surgery; CI, confidence interval; ER, oestrogen receptor; HER2, human epidermal growth factor receptor 2; HR, hazard ratio; LNs, lymph nodes; OBC, occult breast cancer; PR, progesterone receptor; UD, undifferentiated.



**Table S4** Clinicopathological characteristics of OBC patients in different treatment groups.

| <b>Variables</b>         | <b>Mastectomy group,<br/>n=153<br/>(%)</b> | <b>BCS group,<br/>n=151<br/>(%)</b> | <b>ALND-only group,<br/>n=54<br/>(%)</b> | <b>SLND-only group,<br/>n=36<br/>(%)</b> | <b>P-value <sup>a</sup></b> |
|--------------------------|--------------------------------------------|-------------------------------------|------------------------------------------|------------------------------------------|-----------------------------|
| <b>Year of diagnosis</b> |                                            |                                     |                                          |                                          | 0.933                       |
| 2004-2009                | 85 (55.56)                                 | 80 (52.98)                          | 31 (57.41)                               | 19 (52.78)                               |                             |
| 2010-2014                | 68 (44.44)                                 | 71 (47.02)                          | 23 (42.59)                               | 17 (47.22)                               |                             |
| <b>Age at diagnosis</b>  |                                            |                                     |                                          |                                          | 0.003                       |
| 18-49                    | 50 (32.68)                                 | 26 (17.22)                          | 8 (14.81)                                | 6 (16.67)                                |                             |
| ≥50                      | 103 (67.32)                                | 125 (82.78)                         | 46 (85.19)                               | 30 (83.33)                               |                             |
| <b>Race</b>              |                                            |                                     |                                          |                                          | 0.500                       |
| White                    | 127 (83.01)                                | 117 (77.49)                         | 45 (83.33)                               | 27 (75.00)                               |                             |
| Black                    | 20 (13.07)                                 | 19 (12.58)                          | 4 (7.41)                                 | 7 (19.44)                                |                             |
| Others <sup>b</sup>      | 6 (3.92)                                   | 14 (9.27)                           | 5 (9.26)                                 | 2 (5.56)                                 |                             |
| Unknown                  | 0 (0.00)                                   | 1 (0.66)                            | 0 (0.00)                                 | 0 (0.00)                                 |                             |
| <b>Marital status</b>    |                                            |                                     |                                          |                                          | 0.154                       |
| Married                  | 93 (60.78)                                 | 88 (58.28)                          | 28 (51.85)                               | 13 (36.11)                               |                             |
| Not married <sup>c</sup> | 58 (37.91)                                 | 59 (39.07)                          | 25 (46.30)                               | 21 (58.33)                               |                             |
| Unknown                  | 2 (1.31)                                   | 4 (2.65)                            | 1 (1.85)                                 | 2 (5.56)                                 |                             |
| <b>Laterality</b>        |                                            |                                     |                                          |                                          | 0.445                       |
| Left                     | 72 (47.06)                                 | 82 (54.30)                          | 30 (55.56)                               | 21 (58.33)                               |                             |
| Right                    | 81 (52.94)                                 | 69 (45.70)                          | 24 (44.44)                               | 15 (41.67)                               |                             |
| <b>Grade</b>             |                                            |                                     |                                          |                                          | 0.635                       |
| 1 and 2                  | 11 (7.19)                                  | 9 (5.96)                            | 2 (3.70)                                 | 0 (0.00)                                 |                             |
| 3 and UD                 | 39 (25.49)                                 | 36 (23.84)                          | 13 (24.08)                               | 7 (19.44)                                |                             |
| Unknown                  | 103 (67.32)                                | 106 (70.20)                         | 39 (72.22)                               | 29 (80.56)                               |                             |
| <b>AJCC stage</b>        |                                            |                                     |                                          |                                          | 0.022                       |

|                            |            |            |            |            |       |
|----------------------------|------------|------------|------------|------------|-------|
| II                         | 82 (53.59) | 83 (54.97) | 28 (51.85) | 29 (80.56) |       |
| III                        | 71 (46.41) | 68 (45.03) | 26 (48.15) | 7 (19.44)  |       |
| <b>AJCC N stage</b>        |            |            |            |            | 0.071 |
| N1                         | 82 (53.60) | 83 (54.97) | 28 (51.85) | 29 (80.56) |       |
| N2                         | 37 (24.18) | 33 (21.85) | 14 (25.93) | 1 (2.78)   |       |
| N3                         | 34 (22.22) | 35 (23.18) | 12 (22.22) | 6 (16.67)  |       |
| <b>ER status</b>           |            |            |            |            | 0.501 |
| Positive                   | 83 (54.25) | 89 (58.94) | 34 (62.96) | 16 (44.44) |       |
| Negative                   | 59 (38.56) | 53 (35.10) | 16 (29.63) | 15 (41.67) |       |
| Others <sup>d</sup>        | 11 (7.19)  | 9 (5.96)   | 4 (7.41)   | 5 (13.89)  |       |
| <b>PR status</b>           |            |            |            |            | 0.438 |
| Positive                   | 52 (33.99) | 63 (41.72) | 24 (44.45) | 13 (36.11) |       |
| Negative                   | 87 (56.86) | 74 (49.01) | 23 (42.59) | 17 (47.22) |       |
| Others <sup>c,d</sup>      | 14 (9.15)  | 14 (9.27)  | 7 (12.96)  | 6 (16.67)  |       |
| <b>HER2 status</b>         |            |            |            |            | 0.990 |
| Positive                   | 19 (12.42) | 17 (11.26) | 6 (11.11)  | 5 (13.89)  |       |
| Negative                   | 41 (26.80) | 46 (30.46) | 15 (27.78) | 9 (25.00)  |       |
| Others <sup>e</sup>        | 93 (60.78) | 88 (58.28) | 33 (61.11) | 22 (61.11) |       |
| <b>No. of positive LNs</b> |            |            |            |            | 0.003 |
| 1-3                        | 80 (52.29) | 80 (52.98) | 31 (57.41) | 34 (94.44) |       |
| 4-9                        | 37 (24.18) | 33 (21.85) | 12 (22.22) | 1 (2.78)   |       |
| ≥10                        | 32 (20.92) | 31 (20.53) | 10 (18.52) | 0 (0.00)   |       |
| Unknown                    | 4 (2.61)   | 7 (4.64)   | 1 (1.85)   | 1 (2.78)   |       |

**Note:** <sup>a</sup>P-value was assessed using the Pearson's  $\chi^2$  test or Fisher's exact test.

<sup>b</sup>Including American Indian/Alaskan native and Asian/Pacific Islander.

<sup>c</sup>Including divorced, separated, single (never married), and widowed.

<sup>d</sup>Including borderline and unknown.

<sup>e</sup>Including borderline and unknown and not 2010+breast.

**Abbreviations:** AJCC, American Joint Committee on Cancer; ALND, axillary lymph node dissection; BCS, breast-conserving surgery; ER, oestrogen receptor; HER2, human epidermal growth factor receptor 2; LNs, lymph nodes; OBC, occult breast cancer; PR, progesterone receptor; SLND, sentinel lymph node dissection; UD, undifferentiated.

**Table S5** Univariable analysis of breast cancer-specific survival (BCSS) and overall survival (OS) in OBC patients.

| Variables                | BCSS |                   |         | OS |                   |         |
|--------------------------|------|-------------------|---------|----|-------------------|---------|
|                          | n    | HR (95% CI)       | P-value | n  | HR (95% CI)       | P-value |
| <b>Year of diagnosis</b> |      |                   |         |    |                   |         |
| 2004-2009                | 31   | Reference         | —       | 45 | Reference         | —       |
| 2010-2014                | 10   | 1.03 (0.48-2.21)  | 0.070   | 12 | 0.99 (0.49-1.99)  | 0.966   |
| <b>Age at diagnosis</b>  |      |                   |         |    |                   |         |
| 18-49                    | 8    | Reference         | —       | 9  | Reference         | —       |
| ≥50                      | 33   | 1.44 (0.66-3.11)  | 0.359   | 48 | 1.88 (0.92-3.84)  | 0.082   |
| <b>Race</b>              |      |                   |         |    |                   |         |
| White                    | 36   | Reference         | —       | 48 | Reference         | —       |
| Black                    | 4    | 0.75 (0.27-2.12)  | 0.591   | 7  | 0.98 (0.44-2.17)  | 0.962   |
| Others <sup>a</sup>      | 1    | 0.42 (0.06-3.03)  | 0.387   | 2  | 0.60 (0.14-2.46)  | 0.474   |
| <b>Marital status</b>    |      |                   |         |    |                   |         |
| Married                  | 22   | Reference         | —       | 29 | Reference         | —       |
| Not married <sup>b</sup> | 17   | 1.19 (0.63-2.24)  | 0.596   | 26 | 1.41 (0.83-2.39)  | 0.209   |
| Unknown                  | 2    | 2.33 (0.55-9.98)  | 0.253   | 2  | 1.94 (0.46-8.18)  | 0.365   |
| <b>Laterality</b>        |      |                   |         |    |                   |         |
| Left                     | 22   | Reference         | —       | 30 | Reference         | —       |
| Right                    | 19   | 0.92 (0.50-1.71)  | 0.800   | 27 | 0.99 (0.56-1.60)  | 0.843   |
| <b>Grade</b>             |      |                   |         |    |                   |         |
| 1 and 2                  | 1    | Reference         | —       | 1  | Reference         | —       |
| 3 and UD                 | 14   | 2.51 (0.33-19.12) | 0.373   | 19 | 3.40 (0.46-25.42) | 0.233   |
| Unknown                  | 26   | 1.68 (0.23-12.39) | 0.611   | 37 | 2.41 (0.33-17.56) | 0.386   |
| <b>ER status</b>         |      |                   |         |    |                   |         |

|                            |    |                   |        |    |                   |        |
|----------------------------|----|-------------------|--------|----|-------------------|--------|
| Positive                   | 15 | Reference         | —      | 21 | Reference         | —      |
| Negative                   | 21 | 2.11 (1.09-4.10)  | 0.027  | 30 | 2.12 (1.21-3.70)  | 0.008  |
| Unknown <sup>c</sup>       | 5  | 2.25 (0.82-6.20)  | 0.116  | 6  | 1.92 (0.77-4.76)  | 0.160  |
| <b>PR status</b>           |    |                   |        |    |                   |        |
| Positive                   | 10 | Reference         | —      | 14 | Reference         | —      |
| Negative                   | 26 | 1.99 (0.96-4.12)  | 0.065  | 36 | 1.94 (1.05-3.60)  | 0.035  |
| Unknown <sup>c</sup>       | 5  | 1.58 (0.54-4.63)  | 0.403  | 7  | 1.55 (0.63-3.85)  | 0.344  |
| <b>HER2 status</b>         |    |                   |        |    |                   |        |
| Positive                   | 1  | Reference         | —      | 1  | Reference         | —      |
| Negative                   | 9  | 3.84 (0.49-30.29) | 0.202  | 10 | 4.29 (0.55-33.52) | 0.165  |
| Unknown <sup>d</sup>       | 31 | 2.45 (0.33-18.32) | 0.382  | 46 | 3.20 (0.43-23.69) | 0.254  |
| <b>Treatment strategy</b>  |    |                   |        |    |                   |        |
| Mastectomy group           | 17 | Reference         | —      | 24 | Reference         | —      |
| BCS group                  | 12 | 0.67 (0.32-1.41)  | 0.292  | 14 | 0.55 (0.29-1.07)  | 0.077  |
| ALND-only group            | 4  | 0.69 (0.23-2.04)  | 0.499  | 7  | 0.85 (0.37-1.98)  | 0.709  |
| SLND-only group            | 8  | 2.42 (1.04-5.61)  | 0.040  | 12 | 2.59 (1.29-5.18)  | 0.007  |
| <b>No. of positive LNs</b> |    |                   |        |    |                   |        |
| 1-3                        | 11 | Reference         | —      | 18 | Reference         | —      |
| 4-9                        | 9  | 2.17 (0.90-5.24)  | 0.084  | 15 | 2.20 (1.11-4.37)  | 0.024  |
| ≥10                        | 19 | 5.21 (2.48-10.95) | <0.001 | 21 | 3.50 (1.87-6.57)  | <0.001 |
| Unknown                    | 2  | 6.55 (1.44-29.88) | 0.015  | 3  | 6.60 (1.92-22.80) | 0.003  |

**Note:** <sup>a</sup>Including American Indian/Alaskan native and Asian/Pacific Islander.

<sup>b</sup>Including divorced, separated, single (never married), and widowed.

<sup>c</sup>Including borderline and unknown.

<sup>d</sup>Including borderline and unknown and not 2010+breast.

**Abbreviations:** AJCC, American Joint Committee on Cancer; ALND, axillary lymph node dissection; BCS, breast-conserving surgery; CI, confidence interval; ER, oestrogen receptor; HER2, human epidermal growth factor receptor 2; HR, hazard ratio;

LNs, lymph nodes; n, the number of deaths; OBC, occult breast cancer; PR, progesterone receptor; SLND, sentinel lymph node dissection; UD, undifferentiated.

**Table S6** Clinical outcomes of OBC in different treatment groups.

| Variables   | Treatment groups                     |                                |                                          |                                         | P-Value | P-Value <sup>a</sup> |              |             |               |              |               |
|-------------|--------------------------------------|--------------------------------|------------------------------------------|-----------------------------------------|---------|----------------------|--------------|-------------|---------------|--------------|---------------|
|             | I.<br>Mastectomy<br>group<br>(n=153) | II.<br>BCS<br>group<br>(n=151) | III.<br>ALND-<br>only<br>group<br>(n=54) | IV.<br>SLND-<br>only<br>group<br>(n=36) |         | I vs.<br>II          | I vs.<br>III | I vs.<br>IV | II vs.<br>III | II vs.<br>IV | III vs.<br>IV |
| 5-year BCSS | 88.41%                               | 91.86%                         | 90.96%                                   | 75.13%                                  | 0.023   | 0.588                | 0.785        | <0.001      | 0.535         | <0.001       | 0.004         |
| 5-year OS   | 84.27%                               | 91.13%                         | 85.84%                                   | 64.22%                                  | <0.001  | 0.331                | 0.527        | <0.001      | 0.125         | <0.001       | 0.002         |

**Note:** <sup>a</sup>Multivariable analysis adjusted for oestrogen receptor (ER), progesterone receptor (PR) and number of positive lymph nodes by Cox's proportional hazard regression model.

**Abbreviations:** ALND, axillary lymph node dissection; BCS, breast-conserving surgery; OBC, occult breast cancer; SLND, sentinel lymph node dissection.

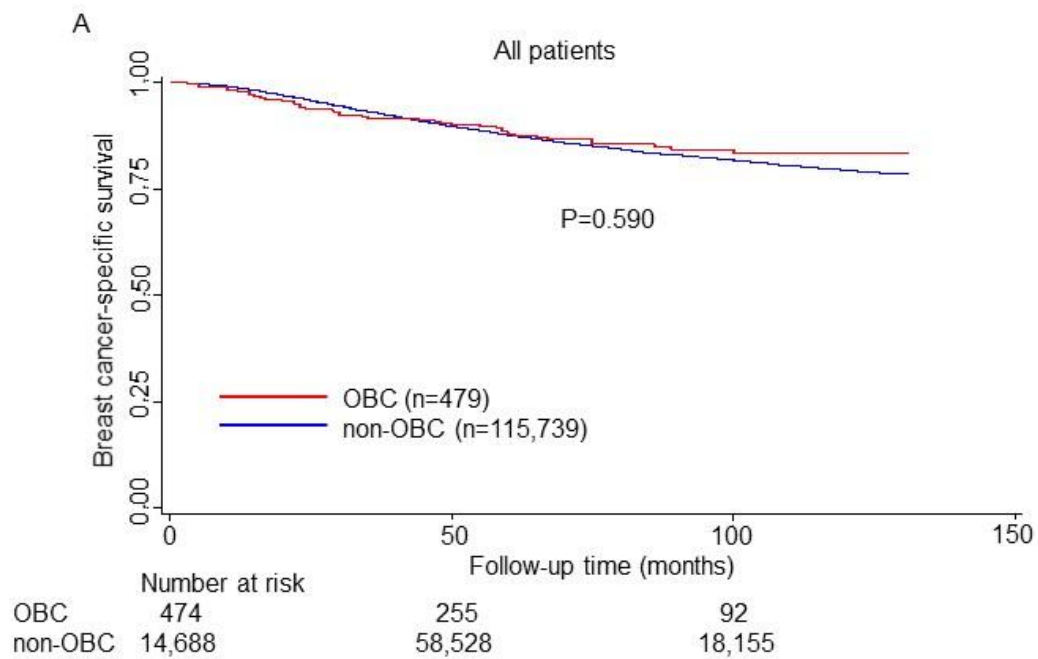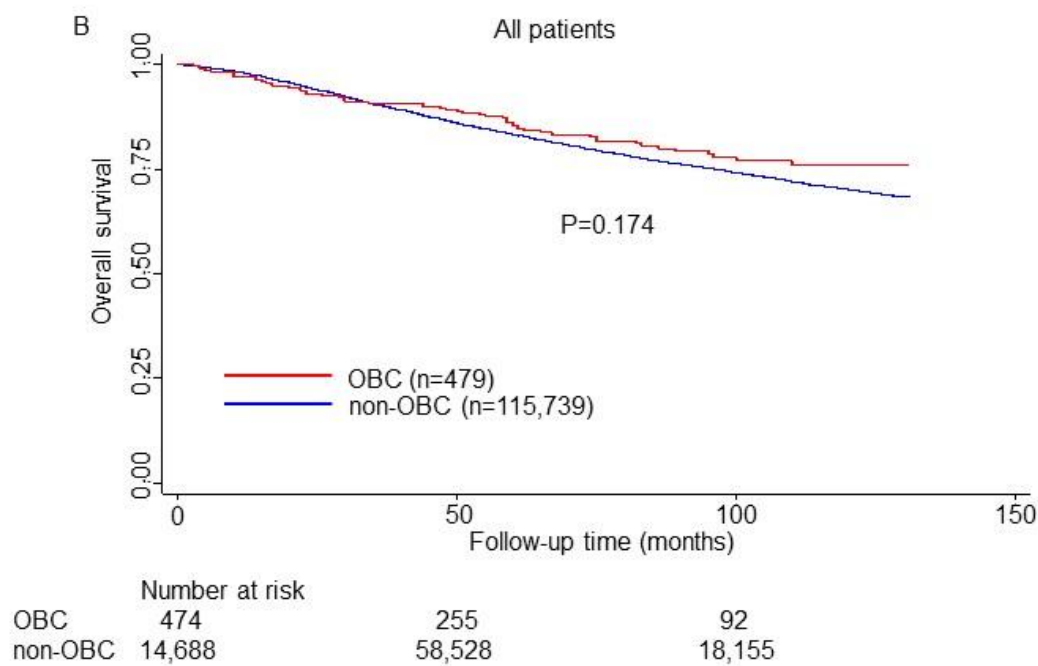



**Figure S1** Kaplan-Meier survival curves for all patients.

**Note:** (A) Breast cancer-specific survival. (B) Overall survival. Log-rank tests were compared between OBC and non-OBC patients.

**Abbreviations:** OBC, occult breast cancer.
